# Supplementary material
Source: PubMed Central journal article supplement (PMC2851764)
Supplement: 0910778107_pnas.200910778SI.pdf [file 0910778107_pnas.200910778SI.pdf]

# Supporting Information

Anderson and Deban 10.1073/pnas.0910778107

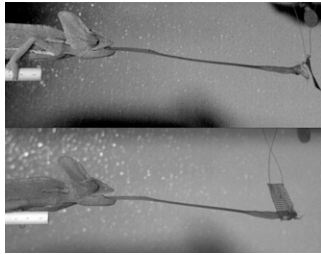

**Movie S1.** Two feedings by a single *Chamaeleo calyptratus* at 15 °C (*Lower*) and 35 °C (*Upper*) showing similar projection performance yet different retraction performance. Image sequences are synchronized at tongue launch and play at 1/100 real time (original rate, 3,000 Hz). The retractor muscle slackens when the tongue accelerator muscle approaches the entoglossal process of the hyoid skeleton (i.e., the stiff structure protruding from the mouth), after which retraction is considerably slower.

[Movie S1](#)
